# Supplementary material for: Promoting Physical Activity and Weight Loss With mHealth Interventions Among Workers: Systematic Review and Meta-analysis of Randomized Controlled Trials
Source: PubMed Central journal article supplement (PMC8817216; doi:10.2196/30682), 2022-01-21
Supplement: mhealth_v10i1e30682_app1.pdf [file mhealth_v10i1e30682_app1.pdf]

## Multimedia Appendix 1. Electronic Search strategy in electronic databases

### PubMed

((((((((mhealth) OR (mobile and (program or promotion or intervention))) OR (mhealth and (program or promotion or intervention))) OR (m-health\*)) OR (Cell Phone)) OR (smart phone)) OR (Telemedicine)) AND (((((((quasi-experiment\*) OR (experimental study)) OR (Intervention study)) OR (non-RCT)) OR (Evaluation Study)) OR (Controlled Clinical Trial)) OR (Clinical Trial)) OR (Randomized Controlled Trial))) AND (((((((((((workforce\*) OR (Occupational Groups)) OR (worker\*)) OR (employee\*)) OR ("working adult")) OR ("working population")) OR (workplace\*)) OR (worksite\*)) OR (Occupational Health Services)) OR (Occupational Health)) OR (Occupational Health Nursing)) OR (employee health promotion))

Results : 2,548 (20.12.08.)

### Embase

'mobile health'/exp OR 'mhealth'/exp OR m-health OR (('mobile' OR 'smart') AND phone/exp) OR 'mobile application\*'/exp OR 'mobile health application\*' OR 'telehealth\*' OR 'text messaging'/exp OR ('mobile\*' AND (promotion OR program OR management OR intervention)) AND ('worker\*' OR 'employee\*' OR 'workforce'/exp OR 'workplace\*'/exp OR 'worksite\*'/exp OR 'working population' OR 'working adult\*' OR 'occupational health service'/exp OR 'occupational health\*') AND ('intervention\*'/exp OR 'randomized controlled trial'/exp OR 'controlled study'/exp OR 'pretest posttest design'/exp OR 'experimental study'/exp OR 'quasi experimental study'/exp OR 'evaluation study'/exp OR 'program evaluation' OR 'program effectiveness')

Results : 2,148 (20.12.09.)

### CINAHL complete

((((((((mhealth) OR (mobile and (program or promotion or intervention))) OR (mhealth and (program or promotion or intervention))) OR (mhealth\*)) OR (Cell Phone)) OR (smart phone)) OR (Telemedicine)) AND (((((((quasi-experiment\*) OR (experimental study)) OR (Intervention study)) OR (non-RCT)) OR (Evaluation Study)) OR (Controlled Clinical Trial)) OR (Clinical Trial)) OR (Randomized Controlled Trial))) AND (((((((((((workforce\*) OR (Occupational Groups)) OR (worker\*)) OR (employee\*)) OR ("working adult")) OR ("working population")) OR (workplace\*)) OR (worksite\*)) OR (Occupational Health Services)) OR (Occupational Health)) OR (Occupational Health Nursing)) OR (employee health promotion))

Results : 230 (20. 12. 08.)

### Cochrane Library

((((((((mhealth) OR (mobile and (program or promotion or intervention))) OR (mhealth and (program or promotion or intervention))) OR (m-health\*)) OR (Cell Phone)) OR (smart phone)) OR (Telemedicine)) AND (((((((quasi-experiment\*) OR (experimental study)) OR (Intervention study)) OR (non-RCT)) OR (Evaluation Study)) OR (Controlled Clinical Trial)) OR (Clinical Trial)) OR (Randomized Controlled Trial))) AND (((((((((((workforce\*) OR (Occupational Groups)) OR (worker\*)) OR (employee\*)) OR ("working adult")) OR ("working population")) OR (workplace\*)) OR (worksite\*)) OR (Occupational Health Services)) OR (Occupational Health)) OR (Occupational Health Nursing)) OR (employee health promotion))

Results : 29 cochrane reviews + 1,300 Trials (20. 12. 09.)
